# Supplementary material
Source: publisher figshare collection journal article supplement (https://sage.figshare.com/ndownloader/files/22217187)
Supplement: Supplementary file [file 22217187]

## Appendix E

## Summary of meta-analyses

|                                                                                                        | k  | n      | Weighted<br>mean effect<br>size ( <i>r</i> ) | CI Lower | CI Upper | <i>Q</i> -Statistic |
|--------------------------------------------------------------------------------------------------------|----|--------|----------------------------------------------|----------|----------|---------------------|
| <u>Outlier excluded</u>                                                                                |    |        |                                              |          |          |                     |
| All studies with information available to calculate <i>r</i> <u>included</u>                           |    |        |                                              |          |          |                     |
| Sleep<br>disturbance                                                                                   | 24 | 34,254 | .27                                          | .24      | .30      | 90.66               |
| Insomnia<br>symptoms                                                                                   | 9  | 10,236 | .28                                          | .24      | .33      | 25.11               |
| Sleep quality                                                                                          | 15 | 24,018 | .26                                          | .22      | .31      | 65.23               |
| <u>Outlier excluded</u>                                                                                |    |        |                                              |          |          |                     |
| Studies with effect size estimates that violate the normality distribution assumptions <u>excluded</u> |    |        |                                              |          |          |                     |
| Sleep<br>disturbance                                                                                   | 18 | 20,218 | .28                                          | .24      | .31      | 60.25               |
| Insomnia<br>symptoms                                                                                   | 8  | 9,046  | .29                                          | .24      | .34      | 24.96               |
| Sleep quality                                                                                          | 10 | 11,172 | .27                                          | .22      | .32      | 32.39               |
| <u>Outlier included</u>                                                                                |    |        |                                              |          |          |                     |
| All studies with information available to calculate <i>r</i> <u>included</u>                           |    |        |                                              |          |          |                     |
| Sleep<br>disturbance                                                                                   | 25 | 34,671 | .29                                          | .25      | .34      | 161.42              |

|                                                                                                        |    |        |     |     |     |        |
|--------------------------------------------------------------------------------------------------------|----|--------|-----|-----|-----|--------|
| Insomnia symptoms                                                                                      | 10 | 10,653 | .33 | .24 | .40 | 92.40  |
| <u>Outlier included</u>                                                                                |    |        |     |     |     |        |
| Studies with effect size estimates that violate the normality distribution assumptions <u>excluded</u> |    |        |     |     |     |        |
| Sleep disturbance                                                                                      | 19 | 20,635 | .30 | .24 | .35 | 124.04 |
| Insomnia symptoms                                                                                      | 9  | 9,463  | .33 | .24 | .42 | 91.47  |

*Notes.* (1) Sleep disturbance is defined as self-reported sleep quality and insomnia symptoms. (2) Analyses only evaluated self-reported sleep quality; see Figure 3 for other effect sizes. (3) CI = Confidence Interval.
